# Supplementary material
Source: publisher site journal article supplement (http://kjim.org/upload/media/kjim-2020-629-suppl5.pdf)
Supplement: Supplementary file 1 [file kjim-2020-629-suppl5.pdf]

**Supplementary Table 5. Sensitivity analyses<sup>a</sup>**

| Sensitivity analyses                                          | OR (95% CI)      |
|---------------------------------------------------------------|------------------|
| Excluding participants without fasting samples (n = 398)      |                  |
| Per 1 SD higher of relative change in WC                      | 1.41 (1.16–1.72) |
| Per 1 SD higher of relative change in WHtR                    | 1.38 (1.13–1.67) |
| Per 1 SD higher of relative change in BRI                     | 1.36 (1.13–1.64) |
| Excluding participants using drugs for hypertension (n = 379) |                  |
| Per 1 SD higher of relative change in WC                      | 1.36 (1.12–1.66) |
| Per 1 SD higher of relative change in WHtR                    | 1.35 (1.11–1.65) |
| Per 1 SD higher of relative change in BRI                     | 1.36 (1.12–1.66) |
| Excluding participants using drugs for dyslipidemia (n = 85)  |                  |
| Per 1 SD higher of relative change in WC                      | 1.42 (1.19–1.69) |
| Per 1 SD higher of relative change in WHtR                    | 1.40 (1.18–1.70) |
| Per 1 SD higher of relative change in BRI                     | 1.40 (1.18–1.65) |

OR, odds ratio; CI, confidence interval; SD, standard deviation; WC, waist circumference; WHtR, waist-height ratio; BRI, body roundness index.

<sup>a</sup>Adjusted for age, sex, body mass index, history of smoking and drinking, systolic blood pressure, hemoglobin A1c, total cholesterol/high-density lipoprotein cholesterol, uric acid, C-reactive protein, and walking speed at baseline.
